# Supplementary material
Source: PubMed Central journal article supplement (PMC6561183)
Supplement: pnas.1808734116.sapp.pdf [file pnas.1808734116.sapp.pdf]

Supplementary Information for

**MULTIPLE *SCN5A* VARIANT ENHANCERS MODULATE ITS CARDIAC  
GENE EXPRESSION AND THE QT INTERVAL**

Ashish Kapoor, Dongwon Lee, Luke Zhu, Elsayed Z. Soliman, Megan L. Grove, Eric  
Boerwinkle, Dan E. Arking, Aravinda Chakravarti

Aravinda Chakravarti

Email: aravinda.chakravarti@nyulangone.org

Ashish Kapoor

Email: ashish.kapoor@uth.tmc.edu

**This PDF file includes:**

Figures S1 to S11

Tables S1 to S5

References for SI reference citations

**Other supplementary materials for this manuscript include the following:**

Dataset S1-S11

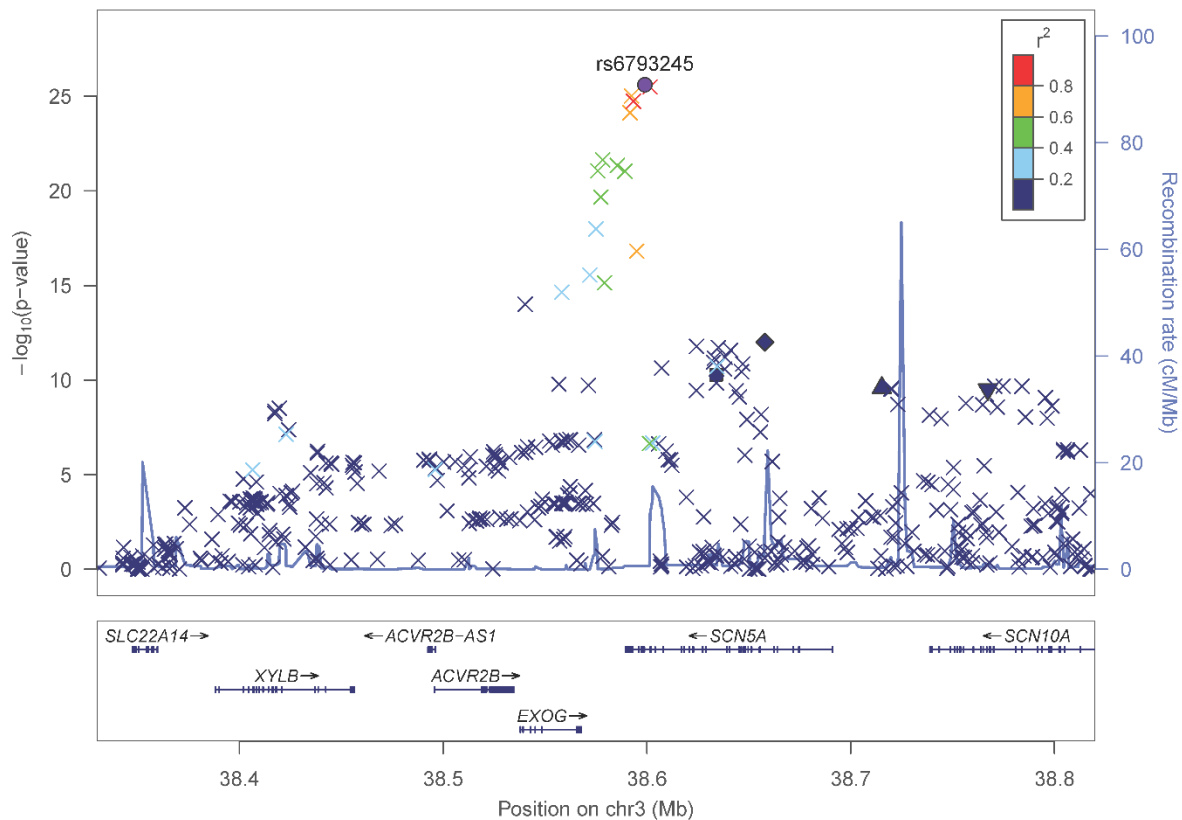

**Figure S1: Regional association plot of variants at the *SCN5A-SCN10A* locus and QT Interval in the QT-IGC GWAS (1).** The X-axis is the genomic interval annotated with gene models, the left Y-axis the statistical significance of association ( $-\log_{10}p$ ), and the right Y-axis the recombination rate (blue trace, cM (centiMorgan)/Mb(megabase)) based on HapMap samples (2). The most significant SNP, rs6793245, is shown as a purple circle. The four independent secondary signals are shown as square (rs11708996), diamond (rs1171007), triangle point-up (rs6599234) and triangle point-down (rs6801957); all other variants are shown as cross marks. All variants are color-coded based on their LD ( $r^2$ ) with the index SNP. The plot was generated with LocusZoom (<http://locuszoom.org/>).

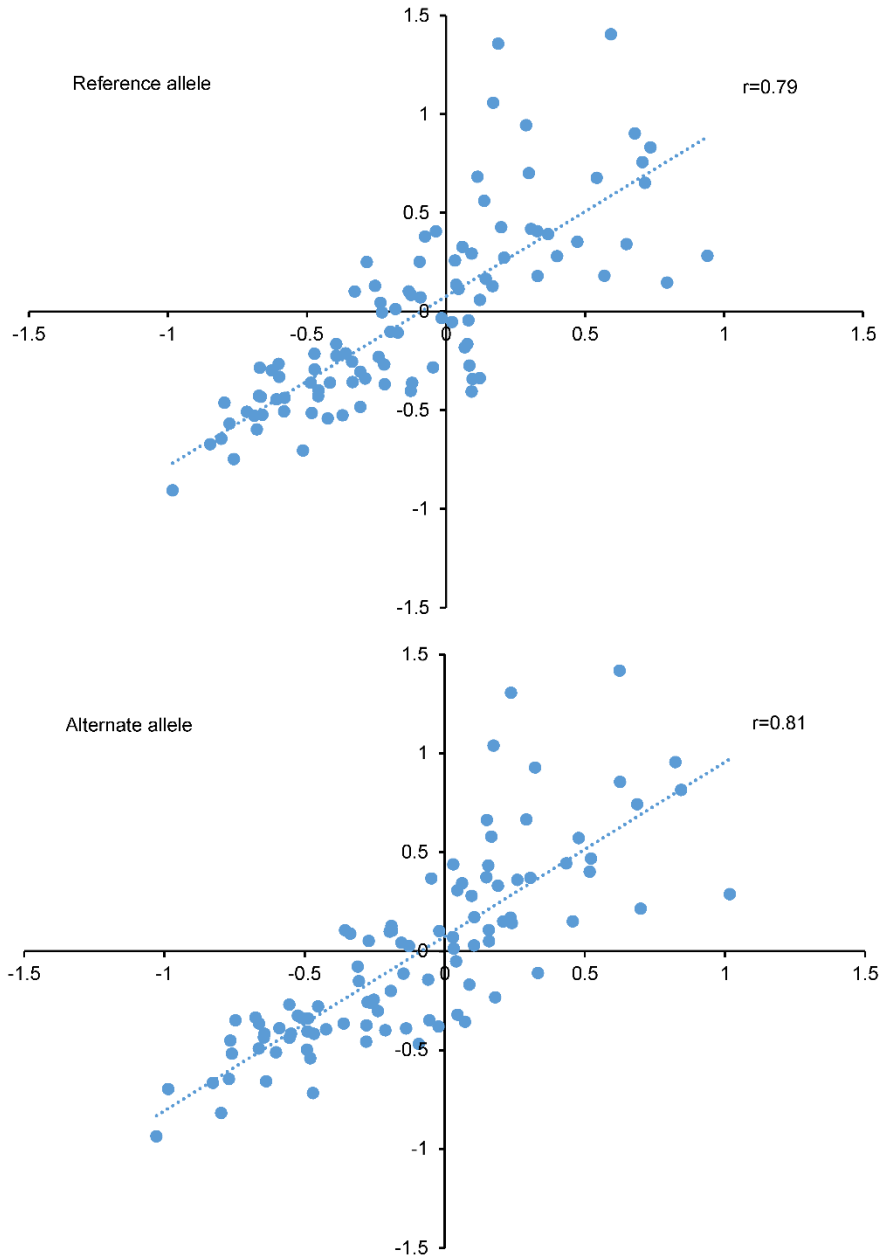

**Figure S2: High correlation between allelic reporter activity of test elements in HL1 and AC16 cells.** Scatter plots of  $\log_{10}$ -transformed mean normalized reporter activities of reference (top) and alternate (bottom) alleles containing amplicons in *in vitro* reporter assays performed in HL1 (X-axis) and AC16 (Y-axis) cells.

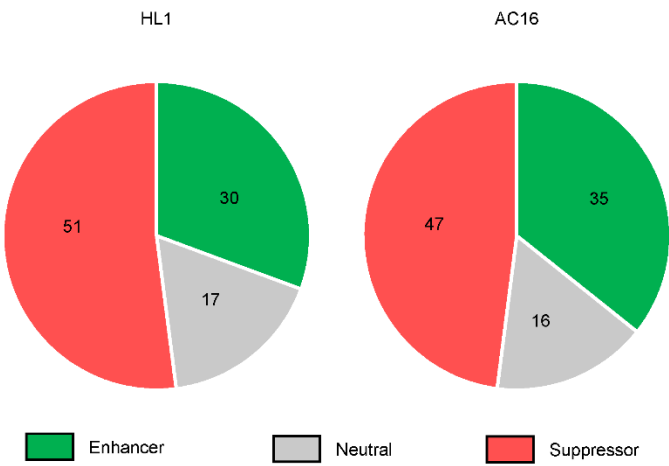

**Figure S3: Distribution of the number of test elements defined as enhancers, suppressors or neutral based on mean standardized reporter activity in *in vitro* reporter assays; data from HL1 (left) and AC16 (right) cells are shown.**

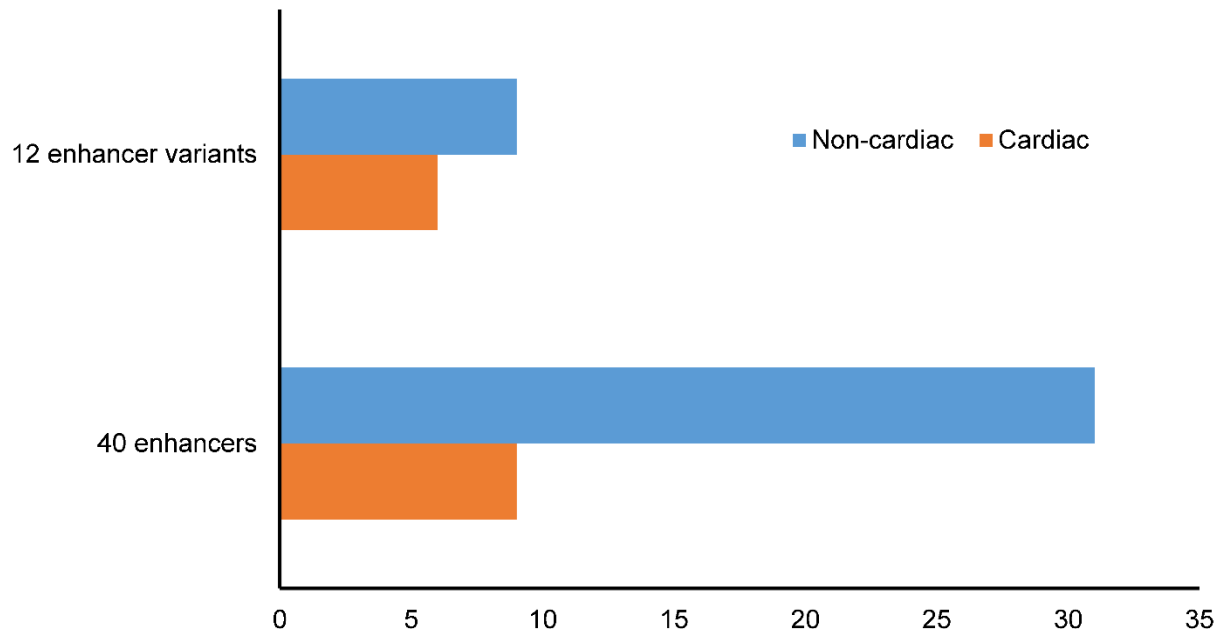

**Figure S4: Overlap of *cis*-regulatory elements tested in *in vitro* reporter assays in HL1 and/or AC16 cells with open chromatin regions in human tissues and cells.** Bar plots showing the number of enhancers, of the 40 *cis*-regulatory elements observed across reporter assays in HL1 and AC16 cells, or of the subset of 12 variants with significant allelic difference in reporter activity, marked as open chromatin regions in cardiac and non-cardiac human tissues and cells.

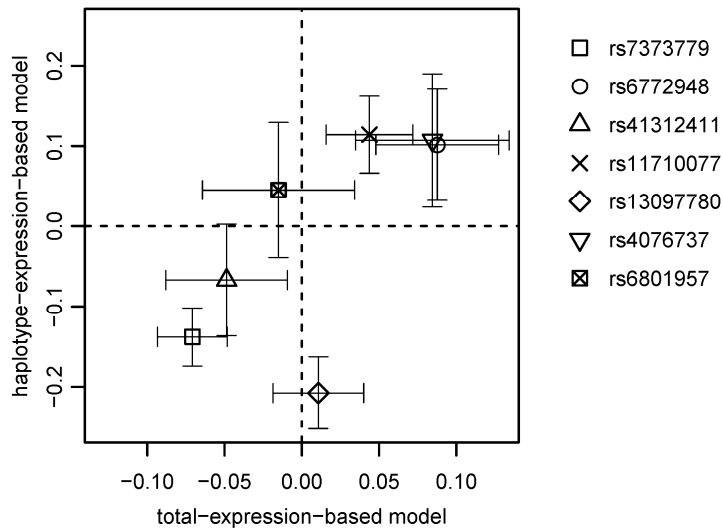

**Figure S5: Two independent models capture the same underlying effects.**

Regression slopes (beta values or effect sizes) from the total-expression-based model were compared to those of the haplotype-expression ratio-based model using the seven most significant causal CRE variants. Error bars are standard errors of beta.

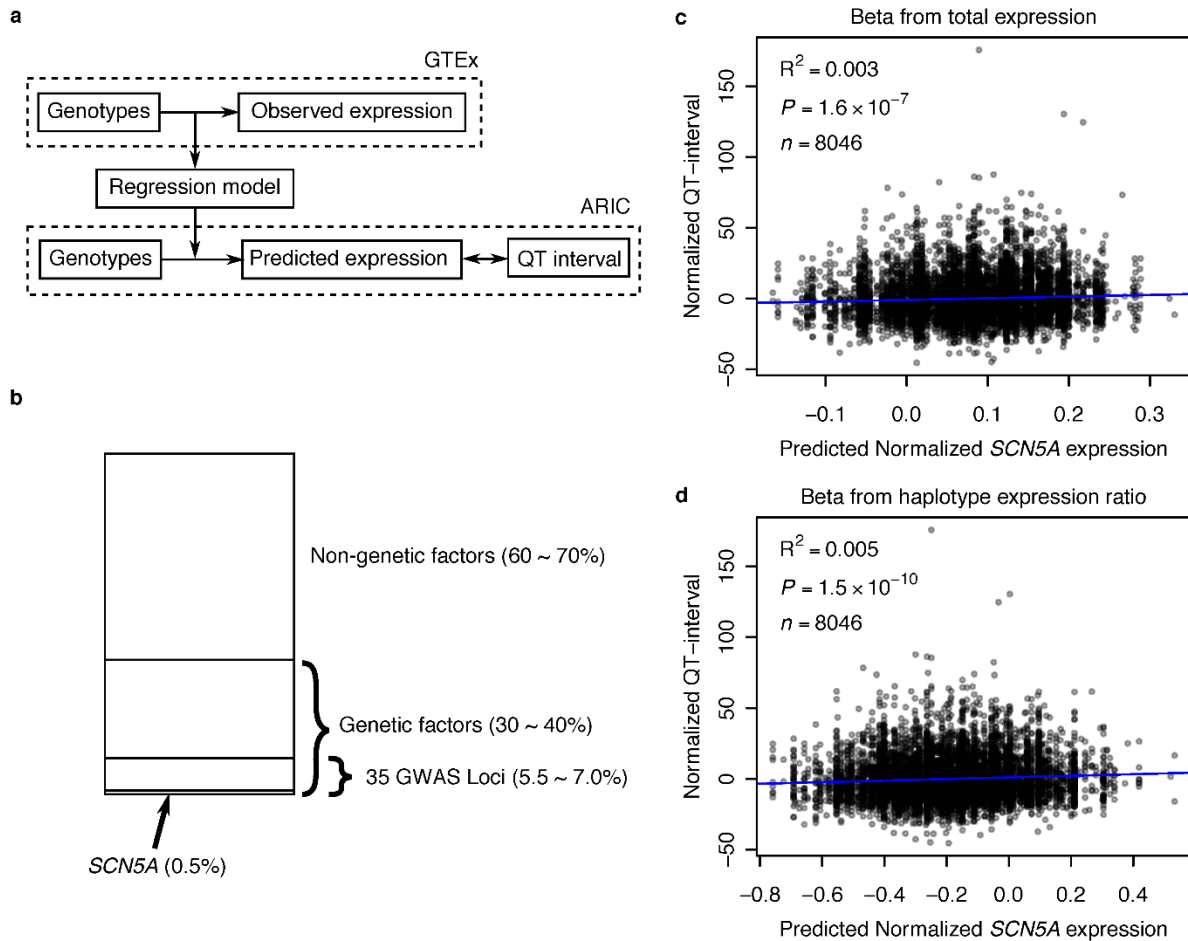

**Figure S6: Significant correlation between predicted *SCN5A* cardiac expression and QT interval.** a) Schematic overview of our approach. A multivariable regression model was built from GTEx data (3) and subsequently used to predict gene expression. b) Classification of QT interval variation by genetic and non-genetic factors. The total estimated heritability of QT interval is from Newton-Cheh *et al.* (4), heritability of QT interval explained by the 35 GWAS loci from Arking *et al.* (1), and heritability of QT interval explained by the *SCN5A* GWAS locus alone is the  $R^2$  from the standard linear regression model between predicted *SCN5A* cardiac expression and QT interval in the ARIC cohort (5). (c-d) Comparison of predicted normalized *SCN5A* cardiac expression and normalized QT interval for all individuals in the ARIC cohort

using beta values for the 7 most significant causal CRE variants from the total-expression-based model (c) and the haplotype-expression ratio-based model (d). The linear regression line is shown in blue.



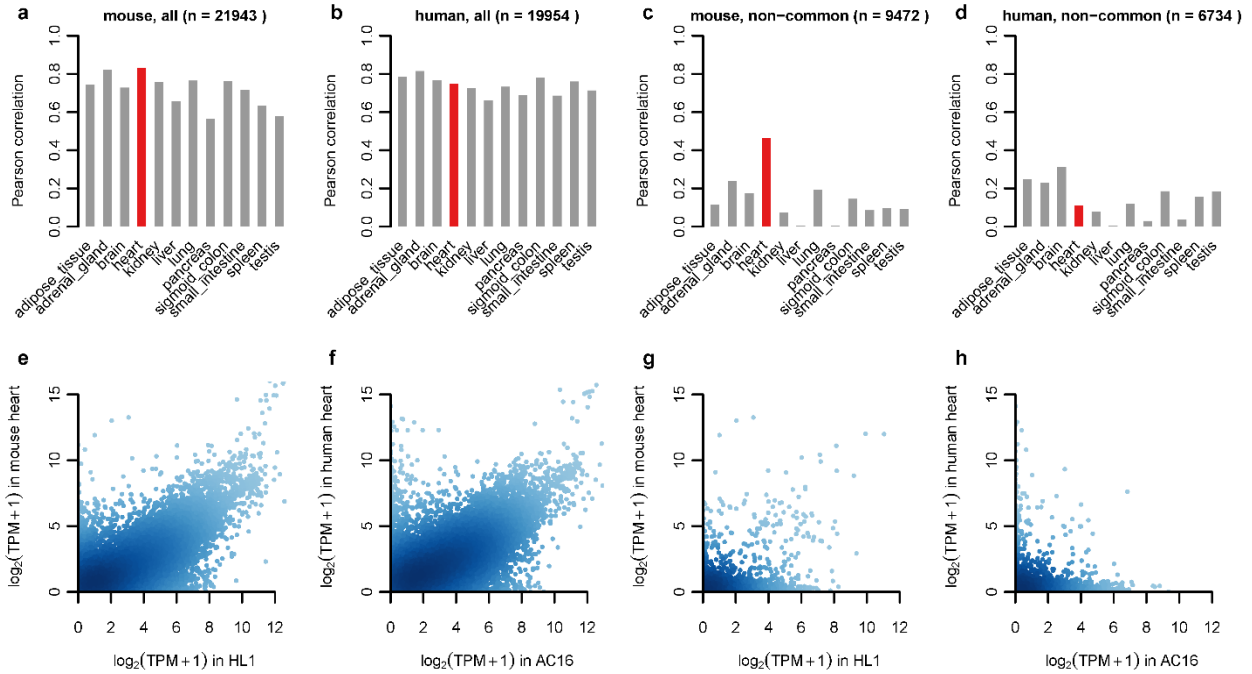

**Figure S7: Gene expression profile of HL1 cells is mostly correlated with heart tissues.** (a-d) Pearson correlation coefficients of gene expression profiles between HL1 (a, c) and AC16 (b, d) cell lines, and twelve mouse (a, c) and human (b, d) adult tissues using protein-coding genes (a, b) or non-common protein-coding genes (c, d). The heart tissue is highlighted in red. (e-h) Scatter plots of gene expression values between HL1 (e, g) and AC16 (f, h) cell lines, and the mouse (e, g) and human (f, h) adult heart tissues using protein-coding genes (e, f) or non-common protein-coding genes (g, h).



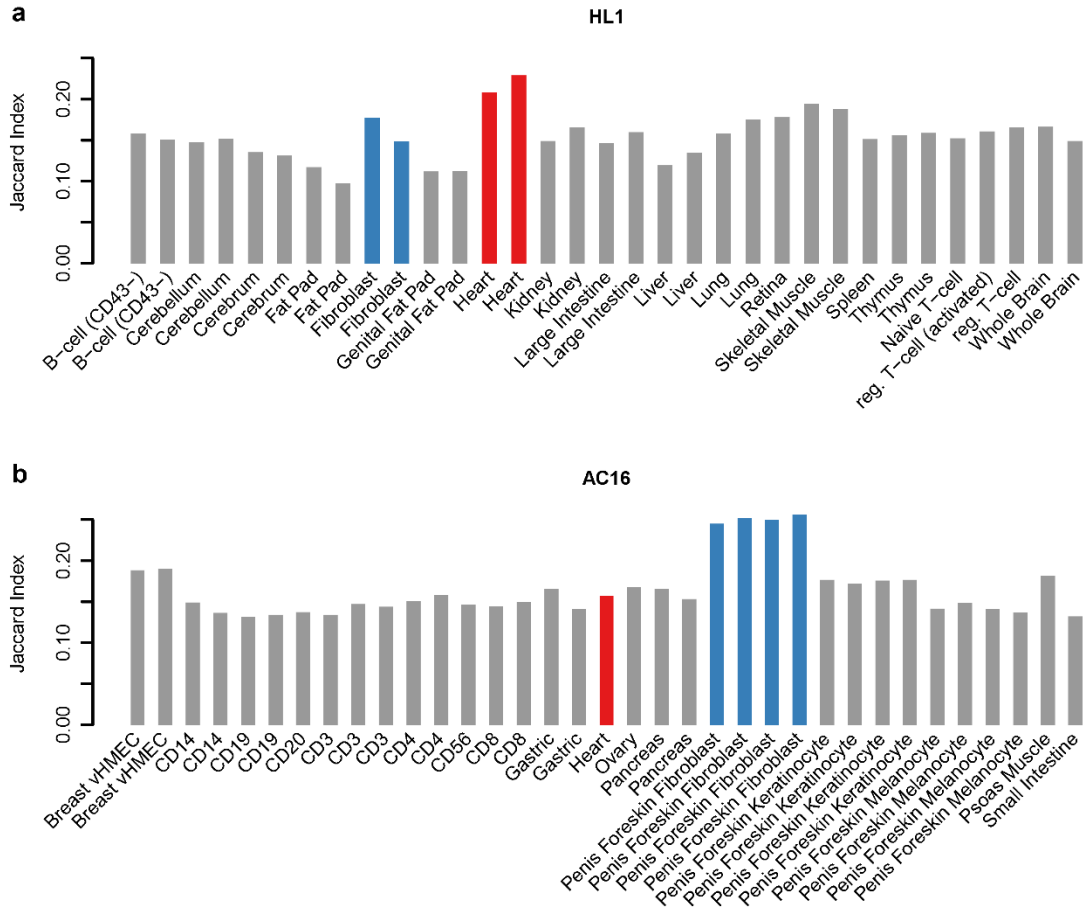

**Figure S9: Comparisons of open chromatin regions in the HL1 and AC16 cell lines to tissues and primary cells.** Bar plots of the Jaccard index of open chromatin between HL1 (a) or AC16 (b) and mouse (a) or human (b) tissues and primary cells. Heart tissues are highlighted in red and fibroblast primary cells in blue.

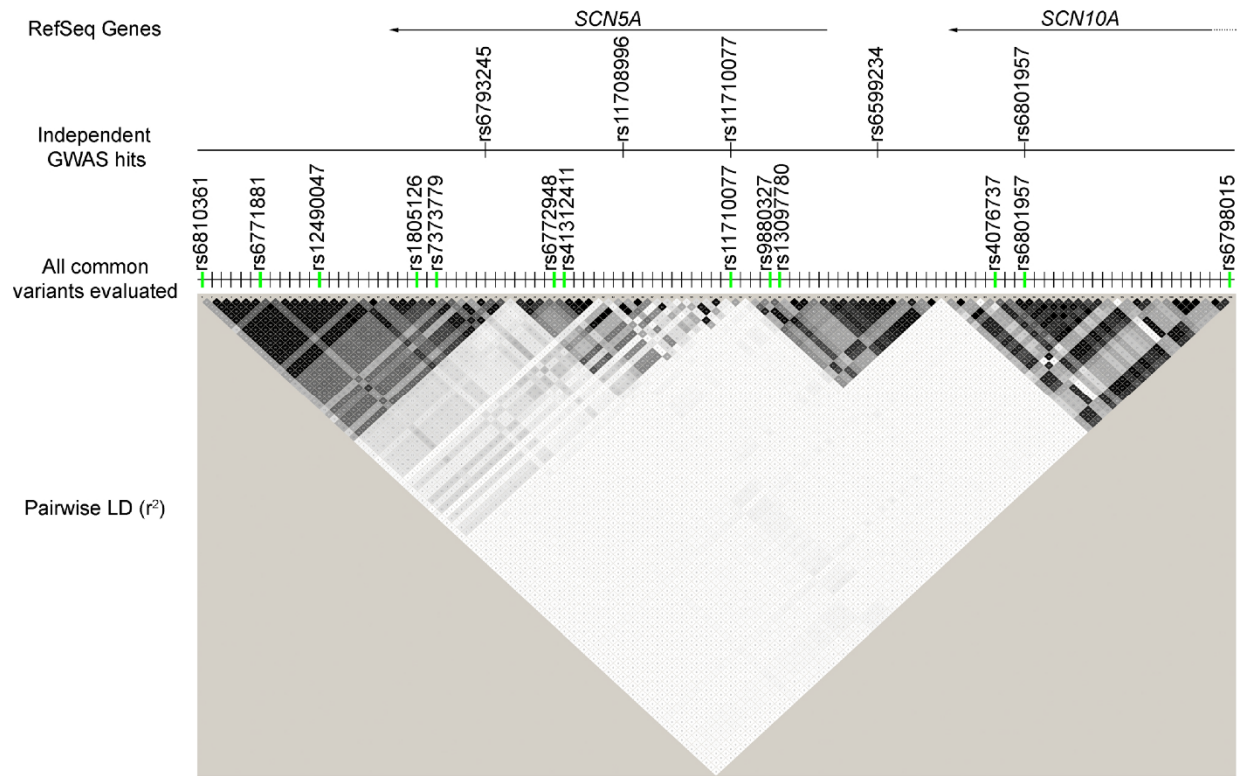

**Figure S10: Multiple functional *cis*-regulatory enhancer variants underlying QT interval association at the *SCN5A*-*SCN10A* locus on chromosome 3p22.2.**

Multiple tracks showing (from top) the two protein-coding genes at the GWAS locus (RefSeq Genes), the five index/sentinel SNPs (Independent GWAS hits), all common (MAF>5%) SNPs in European ancestry subjects in moderate-to-high LD ( $r^2 > 0.3$ ) with the five index SNPs that were evaluated in reporter assays (All common variants evaluated), and, the pairwise LD map for these variants (Pairwise LD ( $r^2$ )). Variants are shown as tick marks: *cis*-regulatory enhancer variants are in green while others are in black. LD measured by  $r^2$  is shown on a grayscale (white:  $r^2=0$ ; black:  $r^2=1$ ).

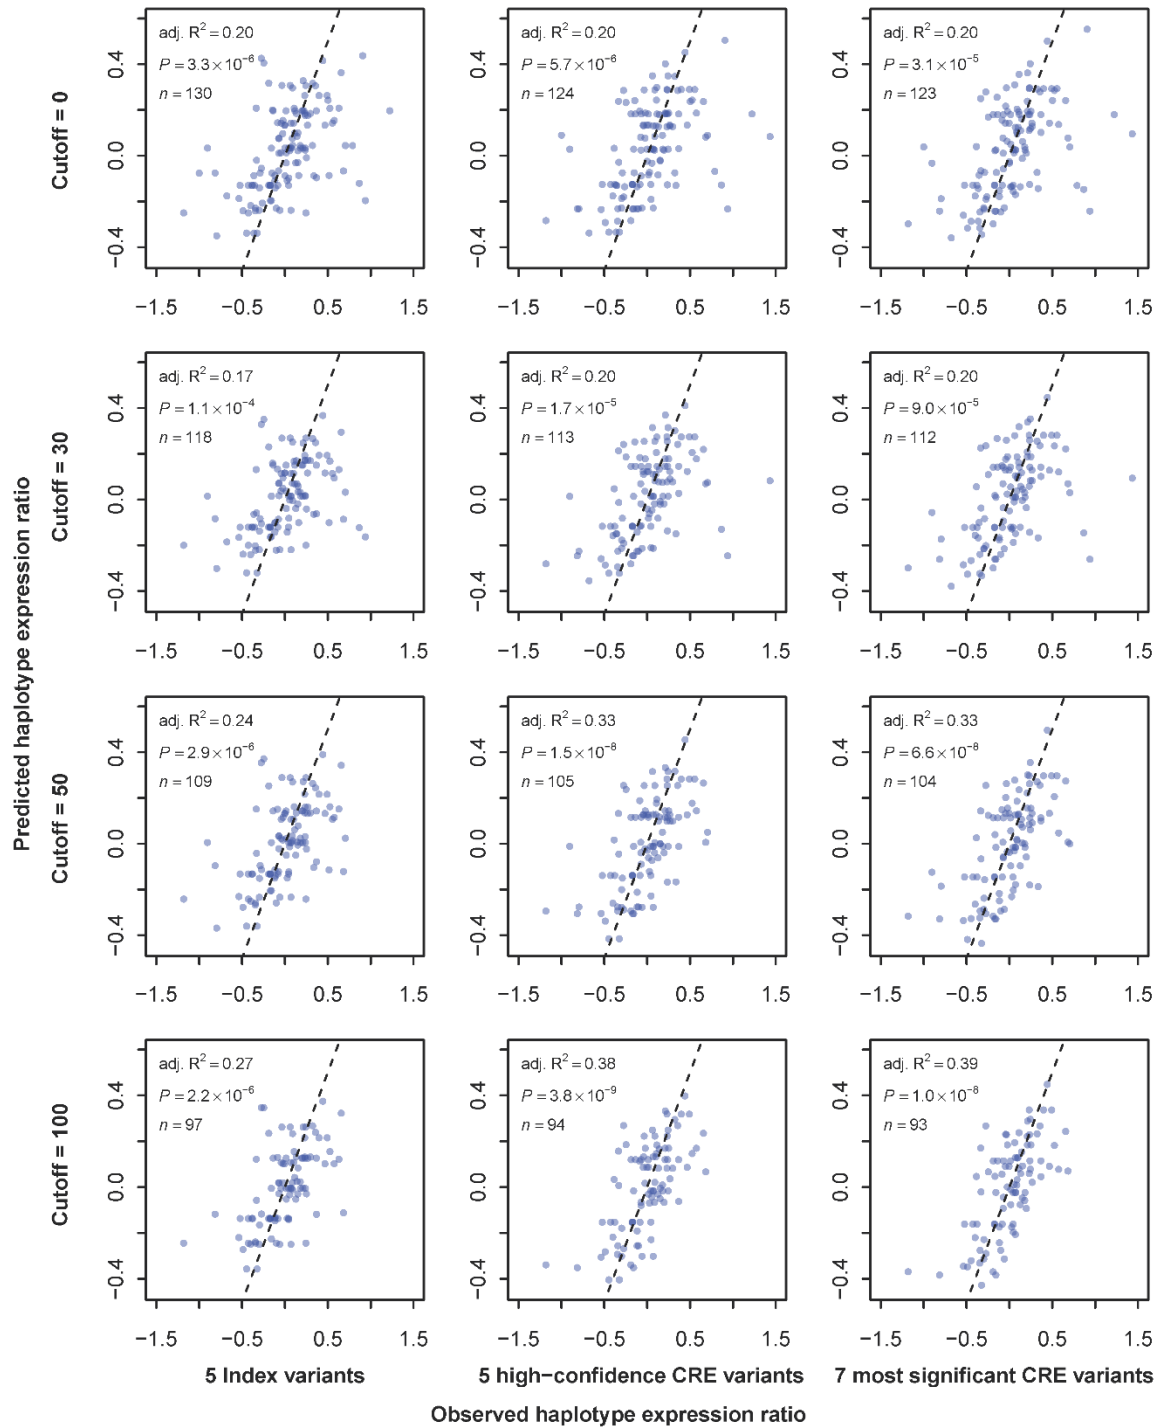

**Figure S11: Removal of noisy samples using a read count filter improves the haplotype expression ratio-based models.** Regression models were built by varying the cutoff of read counts ( $n=0, 30, 50,$  and  $100$ ) for each of the three sets of

variants (5 GWAS index SNPs, 5 high-confidence causal CRE variants, and 7 most significant causal CRE variants), with increasing stringency yielding better correlations.

**Table S1: Target regions around each of the five QT interval associated independent variants at the *SCN5A-SCN10A* locus based on HapMap recombination hotspots (hg19 build).**

| <b>Variant</b> | <b>Upstream hotspot position</b> | <b>Downstream hotspot position</b> | <b>Target region size</b> |
|----------------|----------------------------------|------------------------------------|---------------------------|
| rs6793245      | chr3:38352450                    | chr3:38601556                      | 249,106                   |
| rs11708996     | chr3:38607303                    | chr3:38659275                      | 51,972                    |
| rs11710077     | chr3:38607303                    | chr3:38659275                      | 51,972                    |
| rs6599234      | chr3:38659275                    | chr3:38724849                      | 65,574                    |
| rs6801957      | chr3:38726685                    | chr3:38803509                      | 76,824                    |

**Table S2: Human and mouse tissues with ENCODE RNA-seq data**  
**downloaded from the ENCODE project website.**

| <b>Organism</b> | <b>Tissue</b>   | <b>Sex</b> | <b>Read1<br/>File Accession</b> | <b>Read2<br/>File Accession</b> |
|-----------------|-----------------|------------|---------------------------------|---------------------------------|
| Homo sapiens    | Adipose tissue  | female     | ENCFF592VVB                     | ENCFF359HIQ                     |
| Homo sapiens    | Adrenal gland   | male       | ENCFF709FHN                     | ENCFF681HNP                     |
| Homo sapiens    | Brain           | female     | ENCFF456MMS                     | ENCFF716WNR                     |
| Homo sapiens    | Heart           | female     | ENCFF464TEM                     | ENCFF221QNJ                     |
| Homo sapiens    | Kidney          | male       | ENCFF044VER                     | ENCFF640PYL                     |
| Homo sapiens    | Liver           | male       | ENCFF650JAM                     | ENCFF803DXA                     |
| Homo sapiens    | Lung            | female     | ENCFF911WYB                     | ENCFF723QXK                     |
| Homo sapiens    | Pancreas        | female     | ENCFF541KUW                     | ENCFF386MOY                     |
| Homo sapiens    | Sigmoid colon   | male       | ENCFF322RPT                     | ENCFF782AHJ                     |
| Homo sapiens    | Small intestine | female     | ENCFF540SNP                     | ENCFF999PRA                     |
| Homo sapiens    | Spleen          | female     | ENCFF926YPC                     | ENCFF111IRS                     |
| Homo sapiens    | Testis          | male       | ENCFF034BHU                     | ENCFF788AET                     |
| Mus musculus    | Adipose tissue  | male       | ENCFF128KGA                     | ENCFF510DLJ                     |
| Mus musculus    | Adrenal gland   | female     | ENCFF307YNT                     | ENCFF731TMT                     |
| Mus musculus    | Brain           | male       | ENCFF445AWP                     | ENCFF958CHE                     |
| Mus musculus    | Heart           | female     | ENCFF104UFH                     | ENCFF126WYO                     |
| Mus musculus    | Kidney          | female     | ENCFF214JLE                     | ENCFF883OGF                     |
| Mus musculus    | Liver           | female     | ENCFF492PRP                     | ENCFF581OEV                     |
| Mus musculus    | Lung            | female     | ENCFF146GNS                     | ENCFF280IUI                     |
| Mus musculus    | Pancreas        | female     | ENCFF849WWH                     | ENCFF224IMT                     |
| Mus musculus    | Sigmoid colon   | female     | ENCFF631QWX                     | ENCFF016KHB                     |
| Mus musculus    | Small intestine | female     | ENCFF933LCA                     | ENCFF684WUW                     |
| Mus musculus    | Spleen          | male       | ENCFF432KKN                     | ENCFF859JTH                     |
| Mus musculus    | Testis          | male       | ENCFF682XSC                     | ENCFF690HKC                     |



**Table S3: Human primary cells with ENCODE RNA-seq data downloaded from the ENCODE project website.**

| <b>File Accession</b> | <b>Tissue</b>                      | <b>Sex</b> | <b>Subcellular</b> | <b>Replicate</b> |
|-----------------------|------------------------------------|------------|--------------------|------------------|
| ENCFF322LVK           | foreskin fibroblast                | male       |                    | 1                |
| ENCFF836HXE           | foreskin fibroblast                | male       |                    | 2                |
| ENCFF891KWL           | fibroblast of lung                 | male       |                    | 1                |
| ENCFF388BCD           | fibroblast of lung                 | male       |                    | 2                |
| ENCFF970EZY           | keratinocyte                       | female     | nucleus            | 3                |
| ENCFF759EQF           | keratinocyte                       | female     | nucleus            | 4                |
| ENCFF809ETA           | endothelial cell of umbilical vein | male       | nucleus            | 4                |
| ENCFF492RYM           | endothelial cell of umbilical vein | male       | nucleus            | 3                |
| ENCFF153AIN           | endothelial cell of umbilical vein | male       |                    | 1                |
| ENCFF530HNB           | endothelial cell of umbilical vein | male       |                    | 2                |
| ENCFF031XBL           | endothelial cell of umbilical vein | male       | cytosol            | 4                |
| ENCFF812AVH           | endothelial cell of umbilical vein | male       | cytosol            | 3                |
| ENCFF081MXC           | CD14-positive monocyte             | female     |                    | 1                |
| ENCFF669GZO           | CD14-positive monocyte             | female     |                    | 2                |
| ENCFF052HXO           | keratinocyte                       | female     | cytosol            | 3                |
| ENCFF063XVI           | keratinocyte                       | female     | cytosol            | 4                |
| ENCFF049GRB           | B cell                             | female     |                    | 1                |
| ENCFF422SXS           | B cell                             | female     |                    | 2                |
| ENCFF229LIX           | skeletal muscle myoblast           | unknown    |                    | 1                |
| ENCFF503QBP           | skeletal muscle myoblast           | unknown    |                    | 2                |
| ENCFF372VME           | keratinocyte                       | female     |                    | 1                |
| ENCFF108ERJ           | keratinocyte                       | female     |                    | 2                |
| ENCFF699KSV           | keratinocyte                       | female     |                    | 5                |
| ENCFF458UOE           | fibroblast of lung                 | male       |                    | 2                |
| ENCFF461AOR           | fibroblast of lung                 | male       |                    | 1                |
| ENCFF300LEY           | mammary epithelial cell            | female     |                    | 1                |

**Table S4: Human tissues and primary cells with DNase-seq data  
downloaded from the NIH RoadMap Epigenomics project website.**

| File name                                                                                     | Tissue/Primary cell         |
|-----------------------------------------------------------------------------------------------|-----------------------------|
| UW.Breast_vHMEC.ChromatinAccessibility.RM035.DS18406.bed.gz                                   | Breast vHMEC                |
| UW.Breast_vHMEC.ChromatinAccessibility.RM035.DS18438.bed.gz                                   | Breast vHMEC                |
| UW.CD14_Primary_Cells.ChromatinAccessibility.RO_01689.DS17391.bed.gz                          | CD14                        |
| UW.CD14_Primary_Cells.ChromatinAccessibility.RO_01701.DS17889.bed.gz                          | CD14                        |
| UW.CD19_Primary_Cells.ChromatinAccessibility.RO_01679.DS17186.bed.gz                          | CD19                        |
| UW.CD19_Primary_Cells.ChromatinAccessibility.RO_01689.DS17281.bed.gz                          | CD19                        |
| UW.CD20_Primary_Cells.ChromatinAccessibility.RO_01778.DS17371.bed.gz                          | CD20                        |
| UW.CD3_Primary_Cells.ChromatinAccessibility.CB6_1-4-2011.DS17706.bed.gz                       | CD3                         |
| UW.CD3_Primary_Cells.ChromatinAccessibility.RO_01679.DS17198.bed.gz                           | CD3                         |
| UW.CD3_Primary_Cells.ChromatinAccessibility.RO_01701.DS17534.bed.gz                           | CD3                         |
| UW.CD4_Primary_Cells.ChromatinAccessibility.RO_01679.DS17212.bed.gz                           | CD4                         |
| UW.CD4_Primary_Cells.ChromatinAccessibility.RO_01701.DS17881.bed.gz                           | CD4                         |
| UW.CD56_Primary_Cells.ChromatinAccessibility.RO_01679.DS17189.bed.gz                          | CD56                        |
| UW.CD8_Primary_Cells.ChromatinAccessibility.RO_01679.DS17203.bed.gz                           | CD8                         |
| UW.CD8_Primary_Cells.ChromatinAccessibility.RO_01701.DS17885.bed.gz                           | CD8                         |
| UW.Gastric.ChromatinAccessibility.STL001.DNase.DS20260.bed.gz                                 | Gastric                     |
| UW.Gastric.ChromatinAccessibility.STL003.DNase.DS20748.bed.gz                                 | Gastric                     |
| UW.Heart.ChromatinAccessibility.STL001.DNase.DS20383.bed.gz                                   | Heart                       |
| UW.Ovary.ChromatinAccessibility.STL002.DNase.DS20827.bed.gz                                   | Ovary                       |
| UW.Pancreas.ChromatinAccessibility.STL002.DNase.DS20842.bed.gz                                | Pancreas                    |
| UW.Pancreas.ChromatinAccessibility.STL003.DNase.DS20753.bed.gz                                | Pancreas                    |
| UW.Penis_Foreskin_Fibroblast_Primary_Cells.ChromatinAccessibility.skin01.DS18224.bed.gz       | Penis Foreskin Fibroblast   |
| UW.Penis_Foreskin_Fibroblast_Primary_Cells.ChromatinAccessibility.skin01.DS18229.bed.gz       | Penis Foreskin Fibroblast   |
| UW.Penis_Foreskin_Fibroblast_Primary_Cells.ChromatinAccessibility.skin02.DS18252.bed.gz       | Penis Foreskin Fibroblast   |
| UW.Penis_Foreskin_Fibroblast_Primary_Cells.ChromatinAccessibility.skin02.DS18256.bed.gz       | Penis Foreskin Fibroblast   |
| UW.Penis_Foreskin_Keratinocyte_Primary_Cells.ChromatinAccessibility.skin01.DS18692.bed.gz     | Penis Foreskin Keratinocyte |
| UW.Penis_Foreskin_Keratinocyte_Primary_Cells.ChromatinAccessibility.skin01.DS18695.bed.gz     | Penis Foreskin Keratinocyte |
| UW.Penis_Foreskin_Keratinocyte_Primary_Cells.ChromatinAccessibility.skin02.DS18714.bed.gz     | Penis Foreskin Keratinocyte |
| UW.Penis_Foreskin_Keratinocyte_Primary_Cells.ChromatinAccessibility.skin02.DS18718.bed.gz     | Penis Foreskin Keratinocyte |
| UW.Penis_Foreskin_Melanocyte_Primary_Cells.ChromatinAccessibility.skin01.DS18590.bed.gz       | Penis Foreskin Melanocyte   |
| UW.Penis_Foreskin_Melanocyte_Primary_Cells.ChromatinAccessibility.skin01.DS18601.bed.gz       | Penis Foreskin Melanocyte   |
| UW.Penis_Foreskin_Melanocyte_Primary_Cells.ChromatinAccessibility.skin02.DNase.DS18668.bed.gz | Penis Foreskin Melanocyte   |
| UW.Penis_Foreskin_Melanocyte_Primary_Cells.ChromatinAccessibility.skin02.DNase.DS19662.bed.gz | Penis Foreskin Melanocyte   |
| UW.Psoas_Muscle.ChromatinAccessibility.STL001.DNase.DS20325.bed.gz                            | Psoas Muscle                |
| UW.Small_Intestine.ChromatinAccessibility.STL003.DNase.DS20770.bed.gz                         | Small Intestine             |

**Table S5: Mouse tissues and primary cells with ENCODE DNase-seq data downloaded from the UCSC Genome Browser.**

| <b>File name</b>                                     | <b>Tissue/Primary cell</b> |
|------------------------------------------------------|----------------------------|
| wgEncodeUwDnaseBcellcd43nC57bl6MAdult8wksAlnRep1.bam | B-cell (CD43-)             |
| wgEncodeUwDnaseBcellcd43nC57bl6MAdult8wksAlnRep2.bam | B-cell (CD43-)             |
| wgEncodeUwDnaseCbellumC57bl6MAdult8wksAlnRep2.bam    | Cerebellum                 |
| wgEncodeUwDnaseCerebellumC57bl6MAdult8wksAlnRep1.bam | Cerebellum                 |
| wgEncodeUwDnaseCerebrumC57bl6MAdult8wksAlnRep1.bam   | Cerebrum                   |
| wgEncodeUwDnaseCerebrumC57bl6MAdult8wksAlnRep2.bam   | Cerebrum                   |
| wgEncodeUwDnaseFatC57bl6MAdult8wksAlnRep1.bam        | Fat Pad                    |
| wgEncodeUwDnaseFatC57bl6MAdult8wksAlnRep2.bam        | Fat Pad                    |
| wgEncodeUwDnaseFibroblastC57bl6MAdult8wksAlnRep1.bam | Fibroblast                 |
| wgEncodeUwDnaseFibroblastC57bl6MAdult8wksAlnRep2.bam | Fibroblast                 |
| wgEncodeUwDnaseGfatC57bl6MAdult8wksAlnRep1.bam       | Genital Fat Pad            |
| wgEncodeUwDnaseGfatC57bl6MAdult8wksAlnRep2.bam       | Genital Fat Pad            |
| wgEncodeUwDnaseHeartC57bl6MAdult8wksAlnRep1.bam      | Heart                      |
| wgEncodeUwDnaseHeartC57bl6MAdult8wksAlnRep2.bam      | Heart                      |
| wgEncodeUwDnaseKidneyC57bl6MAdult8wksAlnRep1.bam     | Kidney                     |
| wgEncodeUwDnaseKidneyC57bl6MAdult8wksAlnRep2.bam     | Kidney                     |
| wgEncodeUwDnaseLgintC57bl6MAdult8wksAlnRep1.bam      | Large Intestine            |
| wgEncodeUwDnaseLgintC57bl6MAdult8wksAlnRep2.bam      | Large Intestine            |
| wgEncodeUwDnaseLiverC57bl6MAdult8wksAlnRep1.bam      | Liver                      |
| wgEncodeUwDnaseLiverC57bl6MAdult8wksAlnRep2.bam      | Liver                      |
| wgEncodeUwDnaseLungC57bl6MAdult8wksAlnRep1.bam       | Lung                       |
| wgEncodeUwDnaseLungC57bl6MAdult8wksAlnRep2.bam       | Lung                       |
| wgEncodeUwDnaseRetinaC57bl6MAdult8wksAlnRep1.bam     | Retina                     |
| wgEncodeUwDnaseSkmuscleC57bl6MAdult8wksAlnRep1.bam   | Skeletal Muscle            |
| wgEncodeUwDnaseSkmuscleC57bl6MAdult8wksAlnRep2.bam   | Skeletal Muscle            |
| wgEncodeUwDnaseSpleenC57bl6MAdult8wksAlnRep1.bam     | Spleen                     |
| wgEncodeUwDnaseThymusC57bl6MAdult8wksAlnRep1.bam     | Thymus                     |
| wgEncodeUwDnaseThymusC57bl6MAdult8wksAlnRep2.bam     | Thymus                     |
| wgEncodeUwDnaseTnaiveC57bl6MAdult8wksAlnRep1.bam     | Naive T-cell               |
| wgEncodeUwDnaseTregaC57bl6MAdult8wksAlnRep1.bam      | reg. T-cell (activated)    |
| wgEncodeUwDnaseTregC57bl6MAdult8wksAlnRep1.bam       | reg. T-cell                |
| wgEncodeUwDnaseWbrainC57bl6MAdult8wksAlnRep1.bam     | Whole Brain                |
| wgEncodeUwDnaseWbrainC57bl6MAdult8wksAlnRep2.bam     | Whole Brain                |

## References:

1. Arking DE, *et al* (2014) Genetic association study of QT interval highlights role for calcium signaling pathways in myocardial repolarization. *Nat Genet* 46(8): 826-836.
2. International HapMap Consortium (2005) A haplotype map of the human genome. *Nature* 437(7063): 1299-1320.
3. GTEx Consortium (2015) Human genomics. the genotype-tissue expression (GTEx) pilot analysis: Multitissue gene regulation in humans. *Science* 348(6235): 648-660.
4. Newton-Cheh C, *et al* (2005) QT interval is a heritable quantitative trait with evidence of linkage to chromosome 3 in a genome-wide linkage analysis: The framingham heart study. *Heart Rhythm* 2(3): 277-284.
5. The ARIC Investigators (1989) The atherosclerosis risk in communities (ARIC) study: Design and objectives. *Am J Epidemiol* 129(4): 687-702.
